# Supplementary material for: Exploring Motivation and Barriers to Physical Activity among Active and Inactive Australian Adults
Source: Sports (Basel). 2017 Jun 28;5(3):47. doi: 10.3390/sports5030047 (PMC5968958; doi:10.3390/sports5030047)
Supplement: Supplementary file 1 [file sports-05-00047-s001.pdf]

# Supplementary Materials: Exploring Motivation and Barriers to Physical Activity among Active and Inactive Australian Adults

Erin Hoare <sup>1,\*</sup>, Bill Stavreski <sup>2</sup>, Garry L Jennings <sup>1,2,3,†</sup> and Bronwyn A Kingwell <sup>1,†</sup>

**Supplementary Table 1.** Heart Week Survey active and inactive categories, items relating to motivations and barriers to physical activity with proportions

| Item                                                                                                         | Response | Category | n (%)      |
|--------------------------------------------------------------------------------------------------------------|----------|----------|------------|
| <b>All participants;</b>                                                                                     |          |          | 894 (100)  |
| <b>Which of the following best describes your current level of physical activity?</b>                        |          |          |            |
| I do none or very little physical activity and I do not intend to start in the next six months               | Inactive |          | 52 (5.8)   |
| I do none or very little physical activity, but I am thinking about starting in the next six months          | Inactive |          | 146 (16.3) |
| I do physical activity, but not regularly                                                                    | Active   |          | 312 (34.9) |
| I do physical activity regularly but I only have begun to do so in the last six months                       | Active   |          | 119 (13.3) |
| I do physical activity regularly, and have done so for more than 6 months                                    | Active   |          | 265 (29.6) |
| <b>If Active;</b>                                                                                            |          |          | 696 (77.9) |
| <b>Which of the following is your main motivation for being physically active? (One response allowed)</b>    |          |          |            |
| Lose or maintain weight                                                                                      | Active   |          | 255 (36.6) |
| Gain weight                                                                                                  | Active   |          | 7 (1.0)    |
| Improve appearance                                                                                           | Active   |          | 89 (12.8)  |
| Avoid or manage health conditions                                                                            | Active   |          | 124 (17.8) |
| Improve mood                                                                                                 | Active   |          | 55 (7.9)   |
| Improve athletic performance and/or strength                                                                 | Active   |          | 80 (11.5)  |
| Improve focus                                                                                                | Active   |          | 10 (1.4)   |
| Play with children/grandchildren                                                                             | Active   |          | 18 (2.6)   |
| Participate in social activities (i.e golf, tennis)                                                          | Active   |          | 23 (3.3)   |
| Other                                                                                                        | Active   |          | 35 (5.0)   |
| <b>If Inactive;</b>                                                                                          |          |          | 198 (22.1) |
| <b>Which of the following are you main barriers to being physically active? (Multiple responses allowed)</b> |          |          |            |
| Lack of time                                                                                                 | Inactive |          | 99 (50.0)  |
| Prefer to do other things                                                                                    | Inactive |          | 85 (42.9)  |
| Ill health, injury or disability                                                                             | Inactive |          | 28 (14.1)  |
| I feel too fat/overweight                                                                                    | Inactive |          | 37 (18.7)  |
| I do not enjoy exercise                                                                                      | Inactive |          | 87 (43.9)  |
| Lack of suitable local facilities                                                                            | Inactive |          | 11 (5.6)   |
| I am too old                                                                                                 | Inactive |          | 13 (6.6)   |
| Lack of money                                                                                                | Inactive |          | 32 (16.2)  |
| I have nobody to go with                                                                                     | Inactive |          | 38 (19.2)  |
| The weather puts me off                                                                                      | Inactive |          | 32 (16.2)  |
| Lack of confidence                                                                                           | Inactive |          | 41 (20.7)  |
| Lack of transport                                                                                            | Inactive |          | 4 (2.0)    |
| Traffic or road safety                                                                                       | Inactive |          | 6 (3.0)    |
| Lack of skills                                                                                               | Inactive |          | 17 (8.6)   |
| Nothing prevents me                                                                                          | Inactive |          | 9 (4.6)    |
| Other                                                                                                        | Inactive |          | 15 (8.0)   |
